# Supplementary material for: Turning waste into treasure: chicken eggshell membrane derived fluorescent carbon nanodots for the rapid and sensitive detection of Hg2+ and glutathione
Source: Royal Society of Chemistry journal article supplement (doi:10.1039/d1an01582f), 2021-01-01
Supplement: d1an01582f1.pdf [file d1an01582f1.pdf]

## Supplementary information

### Turning waste into treasure: chicken eggshell membrane derived fluorescent carbon nanodots for rapid and sensitive detection of Hg<sup>2+</sup> and glutathione

Hongding Zhang,<sup>\*a</sup> Sifei Wu,<sup>a</sup> Zhenhua Xing,<sup>b</sup> Hai-Bo Wang<sup>a</sup>

<sup>a</sup> *College of Chemistry and Chemical Engineering, Institute for Conservation and Utilization of Agro-bioresources in Dabie Mountains, Xinyang Key Laboratory of Functional Nanomaterials for Bioanalysis, Xinyang Normal University, Xinyang 464000, PR China*

<sup>b</sup> *Xinyang Branch, Henan Province Institute of Boiler and Pressure Vessel Safety Testing, Xinyang 464000, PR China*

**\*Corresponding author**

Hongding Zhang, Email: zhanghongding0606@163.com, Fax: +86 376 6391172

**Table of content:**

Supporting Figures S1-4, TableS1.

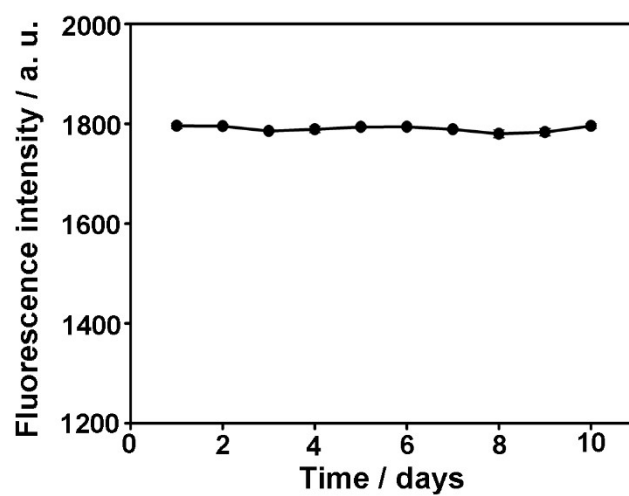

**Fig. S1** The stability of the as-prepared C-Dots.

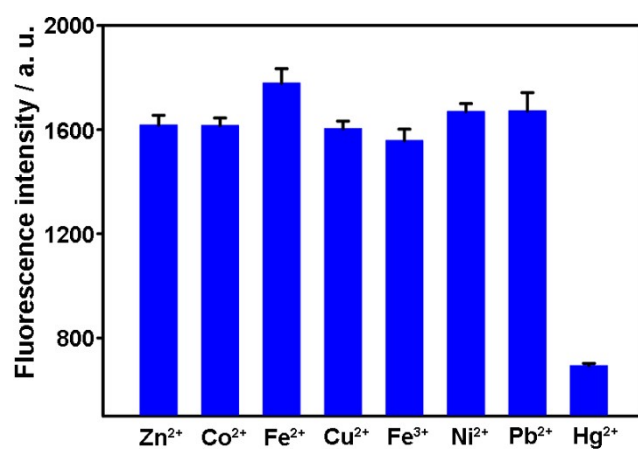

**Fig. S2** Fluorescence intensities of C-Dots in the presence of 20 μM of Zn<sup>2+</sup>, Co<sup>2+</sup>, Fe<sup>2+</sup>, Fe<sup>3+</sup>, Ni<sup>2+</sup>, Pb<sup>2+</sup>, Hg<sup>2+</sup>. The error bars stand for the standard deviation of three repetitive experiments.

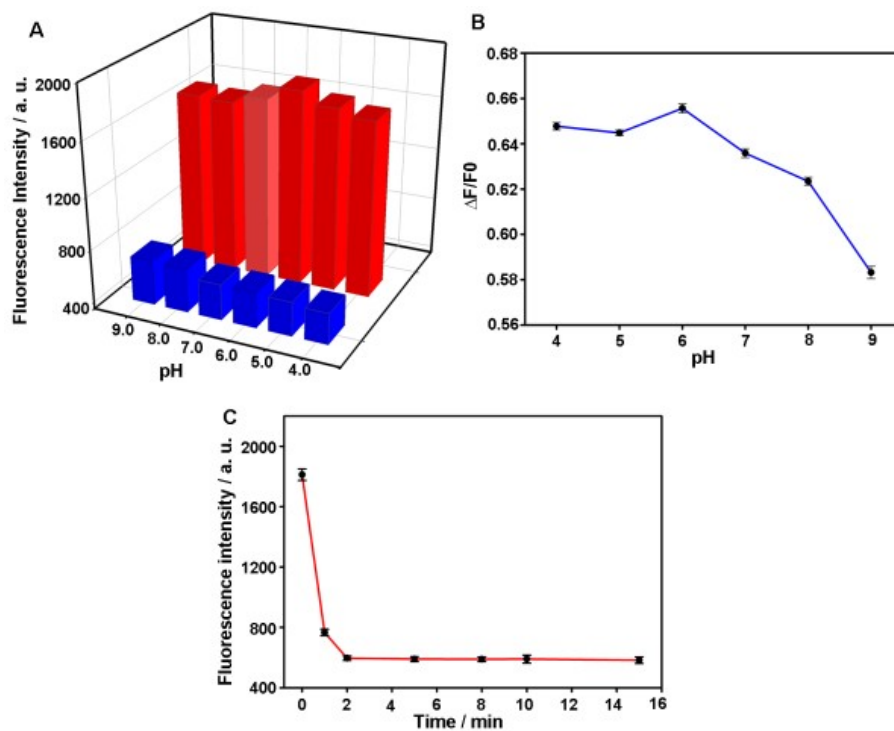

**Fig. S3** (A) Fluorescence intensities of C-Dots and C-Dots-Hg system under various pH values; (B)  $\Delta F/F_0$  of the C-Dots-Hg system under various pH values. (C) Fluorescence intensities of C-Dots-Hg system with different incubation times. The concentration of  $\text{Hg}^{2+}$  is  $50 \mu\text{M}$ . The error bars stand for the standard deviation of three repetitive experiments.

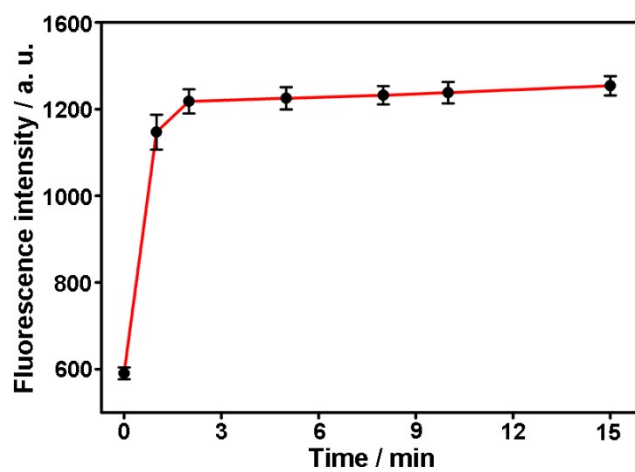

**Fig. S4** Fluorescence intensities of C-Dots-Hg system in the presence of 20  $\mu\text{M}$  GSH with different incubation times. The concentration of  $\text{Hg}^{2+}$  is 50  $\mu\text{M}$ . The error bars stand for the standard deviation of three repetitive experiments.

**Table S1** Comparison of various GSH assays based on C-Dots that are derived from other carbon sources.

| Different carbon sources                           | Detection range ( $\mu\text{M}$ ) | LOD (M)              | Reference |
|----------------------------------------------------|-----------------------------------|----------------------|-----------|
| Ascorbic acid derived C-Dots                       |                                   | $1.5 \times 10^{-5}$ | 1         |
| Soluble starch derived C-Dots                      | 0.5-100                           | $3.5 \times 10^{-7}$ | 2         |
| <i>Tamarindus indica</i> leaves derived C-Dots     | 0-20                              | $1.7 \times 10^{-6}$ | 3         |
| 4,7,10-trioxa-1,13-tridecanediamine derived C-Dots | 30-400                            | $4.6 \times 10^{-7}$ | 4         |
| Sodium citrate derived C-Dots                      | 0-10                              | $2 \times 10^{-8}$   | 5         |
| Eggshell derived C-Dots                            | 0.05-10                           | $9.8 \times 10^{-9}$ | This work |

**Reference:**

- 1 N. Sohal, B. Maity and S. Basu, *ACS Appl. Nano Mater.*, 2020, **3**, 5955-5964.
- 2 S. Gogoi and R. Kan, *New J. Chem.*, 2018, **42**, 6399-6407.
- 3 D. Bano V. Kumar, V. K. Singh, and S. H. Hasan, *New J. Chem.*, 2018, **42**, 5814-5821.
- 4 D. Kong, F. Yan, Y. Luo, Y. Wang, L. Chen and F. Cui, *Anal. Methods*, 2016, **8**, 4736-4743.
- 5 S. Liu, D. Wu, G. Li, Z. Lv, Z. Chen, L. Chen, G. Chen, L. Xia, J. You, and Y. Wu, *RSC Adv.*, 2016, **6**, 103169-10317.
